# Supplementary material for: Derivation of Induced Trophoblast Cell Lines in Cattle by Doxycycline-Inducible piggyBac Vectors
Source: PLoS One. 2016 Dec 1;11(12):e0167550. doi: 10.1371/journal.pone.0167550 (PMC5132304; doi:10.1371/journal.pone.0167550)
Supplement: S1 Table — (XLSX) [file pone.0167550.s004.xlsx]

## Sheet: primers (biPSCs)
Primers for RT-PCR
Gene	Forward	Reverce
O-2A-K (Tg)	GCTCTCCCATGCATTCAAA	ACGCAGTGTCTTCTCCCTTC
c-Myc (Tg)	CTGTCCATTCAAGCAGACGA	ATCAGCCTCGACTGTGCCT
OCT3/4 (Endo)	AGCCAAACGACTATCTGCCG	ACACTCGGACCACGTCTTTC
SOX2 (Endo)	TTACCTCTTCTTCCCACTCC	TTCTTGCTGTCCTCCATTTC
KLF4 (Endo)	CTGCTCACGACTTTCCCTTG	GCAAACTTCCACCCACAACC
c-MYC (Endo)	AGCGACTCTGAGGAAGAACA	CAAGAGTTCCGTATCTGTTCAAG
NANOG	GACACCCTCGACACGGACAC	CTTGACCGGGACCGTCTCTT
CDX2	GCCACCATGTACGTGAGCTAC	ACATGGTATCCGCCGTAGTC
ELF5	TAAATCAGAAGCCCTGGCGAAGA	ACATGAGCTGGATGATGGAGCA
IFN-τ	TCCCCATGGCCTTCGTGCTCTCTCT	CTCAAAGTGAGTTCAGATCTCCACC
ERRβ	CCAACGGTCTGGACTCGCC	GCACACCTTCCTTCAGCAT
EOMES	ACTGGTTCCCACTGGATGAG	CACAGCAATGAACTGCGTTT
PL	CTGCTGGTGGTGTCAAATCTAC	TGGTTGGGTTAATTGTGGGC
PRP1	CGGTCCTGACGTGTTTGTCT	TGTGGCGCTTGATAGGAAGG
PAG1	TCCACTTTCCGGCTTACCAA	CCTTTCATTCTCCCAGATCCAT
bACT	GCGGCATTCACGAAACTACC	CGGACTCATCGTACTCCTGC
